# Supplementary material
Source: publisher figshare collection journal article supplement (https://acs.figshare.com/ndownloader/files/13853615)
Supplement: Supplementary file 1 [file 13853615]

Supporting Information for:

# **Solvent-Engineered Design of Argyrodite $\text{Li}_6\text{PS}_5\text{X}$ (X= Cl, Br, I) Solid Electrolytes with High Ionic Conductivity**

*Laidong Zhou,<sup>a</sup> Kern-Ho Park,<sup>a</sup> Xiaoqi Sun,<sup>a</sup> Fabien Lalère,<sup>a</sup> Torben Adermann,<sup>b</sup> Pascal Hartmann,<sup>b</sup> and Linda F. Nazar<sup>a\*</sup>*

<sup>a</sup> Department of Chemistry and the Waterloo Institute for Nanotechnology, University of Waterloo, 200 University Ave W, Waterloo, Ontario N2L 3G1, Canada

<sup>b</sup> BASF SE, Ludwigshafen 67063, Germany

## Experimental methods

**Material synthesis and characterization.** In an argon-filled glovebox, a stoichiometric 3:1 molar ratio of  $\text{Li}_2\text{S}$  (Sigma-Aldrich, 99.98%) and  $\text{P}_2\text{S}_5$  (Sigma-Aldrich, 99%) were mixed in an agate mortar and dispersed in anhydrous tetrahydrofuran (THF).<sup>1</sup> The mixture was stirred for 24 h at room temperature to obtain a  $\beta\text{-Li}_3\text{PS}_4\cdot 3\text{THF/THF}$  suspension.  $\text{Li}_2\text{S}$  (Sigma-Aldrich, 99.98%) and  $\text{LiX}$  (Sigma-Aldrich, >99%) with the targeted molar ratio were dissolved in anhydrous ethanol, and the solution was added to the above suspension. The color of the mixture changed immediately after addition and the white precipitates gradually dissolved. After stirring overnight, the mixture was centrifuged at 8000 rpm for 10 min to remove any unreacted precipitates. The obtained clear solution was dried under vacuum to remove the solvents. The obtained pale yellow powder was further dried in a Buchi oven at 140°C for 20 h under vacuum to remove remaining solvents. Finally, the poorly crystallized powder was pressed into a pellet and sealed in a carbon-coated quartz tube under vacuum, then annealed at 550°C for 6h with a ramp rate of 5°C/min to obtain the fully crystallized  $\text{Li}_6\text{PS}_5\text{X}$  or  $\text{Li}_{6-y}\text{PS}_{5-y}\text{Cl}_{1+y}$  ( $y = 0 - 0.5$ ) products.

$\text{Li}_3\text{PS}_4\cdot 3\text{THF}$  powder could also be directly used as the precursor (from BASF SE, Germany). In this case,  $\text{Li}_2\text{S}$  (Sigma-Aldrich, 99.98%) and  $\text{LiX}$  (Sigma-Aldrich, >99%) in the targeted molar ratio were dissolved in anhydrous ethanol, and the required amount of  $\text{Li}_3\text{PS}_4\cdot 3\text{THF}$  powder was added to the solution. The white  $\text{Li}_3\text{PS}_4\cdot 3\text{THF}$  powder dissolved gradually and a clear solution was obtained after 30 min. The solution was stirred overnight and dried under vacuum. The obtained pale yellow powder was further dried and crystallized following above-mentioned procedures.

Solid state synthesized  $\text{Li}_6\text{PS}_5\text{Cl}$  was prepared by mechanical ball milling of a stoichiometric mixture of  $\text{Li}_2\text{S}$  (Sigma-Aldrich, 99.98%) and  $\text{P}_2\text{S}_5$  (Sigma-Aldrich, 99%) and  $\text{LiCl}$  (Sigma-Aldrich, >99%) in  $\text{ZrO}_2$  jars with  $\text{ZrO}_2$  balls and milled at 400RPM for 15h using a high energy planetary ball mill (Fritsch PULVERISETTE 7 Premium). The milled powder was pressed into pellets, sealed in a carbon-coated quartz tube under vacuum and sintered at  $550^\circ\text{C}$  for 6h with a ramp rate of  $5^\circ\text{C}/\text{min}$  to crystallize the material.

Material morphologies were examined using a Zeiss field emission scanning electron microscope (SEM) equipped with an energy dispersive X-ray spectroscopy detector (EDX). The samples were transferred to the SEM for imaging with a second exposure to air, via a specially designed transfer holder.

**Powder diffraction and refinement.** X-ray diffraction (XRD) measurements were conducted at room temperature on a PANalytical Empyrean diffractometer with  $\text{Cu-K}\alpha$  radiation equipped with a PIXcel bidimensional detector. XRD patterns for phase identification were obtained in Bragg-Brentano geometry, with samples placed on a zero-background sample holder in an Ar-filled glovebox and protected by Kapton film. Standard addition analysis (degree of crystallinity measurements) was carried out by mixing the sample with 10 wt% Si (standard silicon, 325 mesh, Sigma-Aldrich, 99%), which was used as external reference in Rietveld Refinements, in an Ar-filled glovebox and the mixture was sealed in 0.3 mm glass capillaries. XRD patterns were collected in Debye-Scherrer geometry. Rietveld refinement<sup>2</sup> was performed using the FullProf suite.<sup>3</sup> Scale factor, zero point, background, lattice parameters, phase fraction, fraction coordinates, occupancies, and thermal parameters were sequentially refined for all phases, allowing determination of the fraction of the major argyrodite and the impurities.

**Conductivity measurements.** Ionic conductivities were measured by electrochemical impedance spectroscopy (EIS). Typically, 100 mg of the  $\text{Li}_6\text{PS}_5\text{X}$  and  $\text{Li}_{6-y}\text{PS}_{5-y}\text{Cl}_{1+y}$  powder was placed between two stainless steel rods and pressed into a 10 mm diameter pellet by a hydraulic press at two tons for 3 min in an argon-filled glovebox. The thickness of the pellet was close to 0.6 - 0.8 mm depending on the materials (accurately measured by a caliper for each pellet), and the relative density of the pellets was around 99%; this value was calculated from the sample geometry and mass and compared to the theoretical density of  $\text{Li}_6\text{PS}_5\text{Cl}$  ( $1.64 \text{ g}\cdot\text{cm}^{-3}$ ) and  $\text{Li}_6\text{PS}_5\text{Br}$  ( $1.90 \text{ g}\cdot\text{cm}^{-3}$ ). EIS was performed with a 20 mV constant voltage within a frequency range of 1 MHz-10 mHz using a VMP3 potentiostat/galvanostat (Bio-logic). Error was estimated by the inaccuracy in measuring the pellet thickness, determined over multiple measurements. Direct-current (DC) polarization measurements were conducted on the pellets with applied voltages of 0.25 V, 0.5 V and 0.75 V for 30 min each to determine the electronic conductivity of the argyrodites.

**Galvanostatic cycling studies.** For the galvanostatic cycling study of the solid state cells, working electrodes were prepared by mixing  $\text{TiS}_2$  and  $\text{Li}_6\text{PS}_5\text{Cl}$  powder in a weight ratio of 1:1.  $\text{Li}_{11}\text{Sn}_6$  alloy was prepared by mixing Li foil (Sigma-Aldrich, 99.9%) and Sn powder (Fisher scientific), and used as counter electrode.  $\text{Li}_{11}\text{Sn}_6$  alloy lies at a potential of 0.49 V (vs.  $\text{Li}/\text{Li}^+$ , see below, **Fig. S8**), which is in accord with a previous report.<sup>4</sup> The solid electrolyte layer was formed by pressing 100 mg of  $\text{Li}_6\text{PS}_5\text{Cl}$  powder. The as-prepared electrode mixture (6 mg) and  $\text{Li}_{11}\text{Sn}_6$  (30 mg) were spread on both sides of a  $\text{Li}_6\text{PS}_5\text{Cl}$  pellet, followed by pressing at 374 MPa. All the assembly was carried out in a poly(aryl-ether-ether-ketone (PEEK) mold (diameter: 10 mm) with two Ti rods as the current collectors. The galvanostatic charge-discharge studies were conducted with a current density of  $100 \mu\text{A cm}^{-2}$  (0.11 C).

## List of Supporting Figures

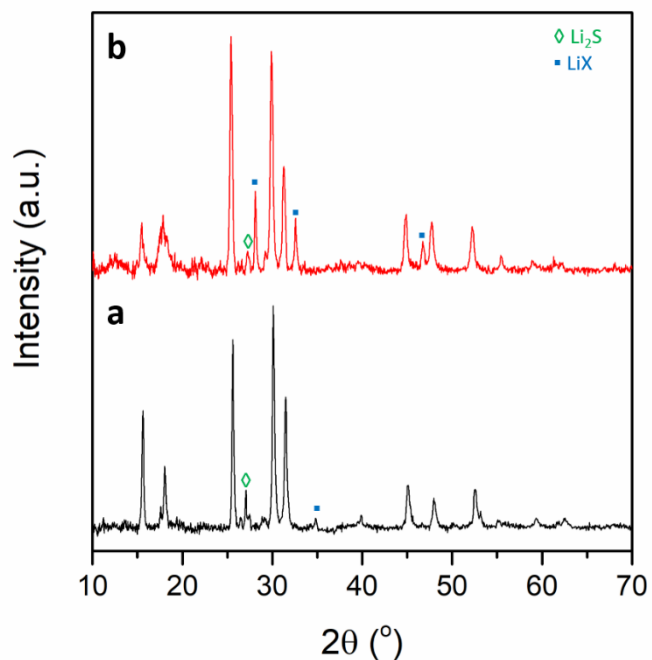

**Figure S1:** XRD patterns of: (a)  $\text{Li}_6\text{PS}_5\text{Cl}$  and (b)  $\text{Li}_6\text{PS}_5\text{Br}$  from solution synthesis after drying at  $140^{\circ}\text{C}$  for 20 h under vacuum (all reflections correspond to the respective argyrodite phase except for the impurities as marked).

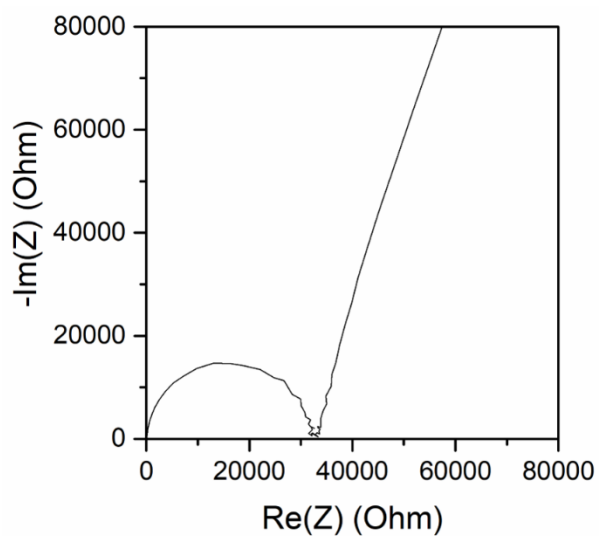

**Figure S2:** Nyquist plot for the  $\text{Li}_6\text{PS}_5\text{I}$  solid electrolyte (cold-pressed at 2 tons, measured at 300K, in the frequency range from 1 MHz-10 mHz).

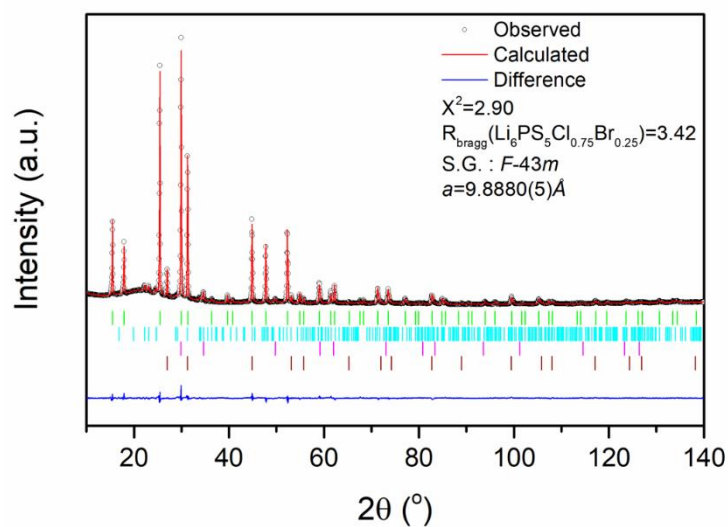

**Figure S3:** Rietveld refinement of XRD patterns of  $\text{Li}_6\text{PS}_5\text{Cl}_{0.75}\text{Br}_{0.25}$ . Black circles – experimental data; red lines – fitted data; blue lines – difference curve between observed and calculated data; ticks – the Bragg peak positions of  $\text{Li}_6\text{PS}_5\text{Cl}_{0.75}\text{Br}_{0.25}$  (green),  $\text{Li}_3\text{PO}_4$  (cyan),  $\text{LiCl}_{0.75}\text{Br}_{0.25}$  (magenta) and  $\text{Li}_2\text{S}$  (burgundy).

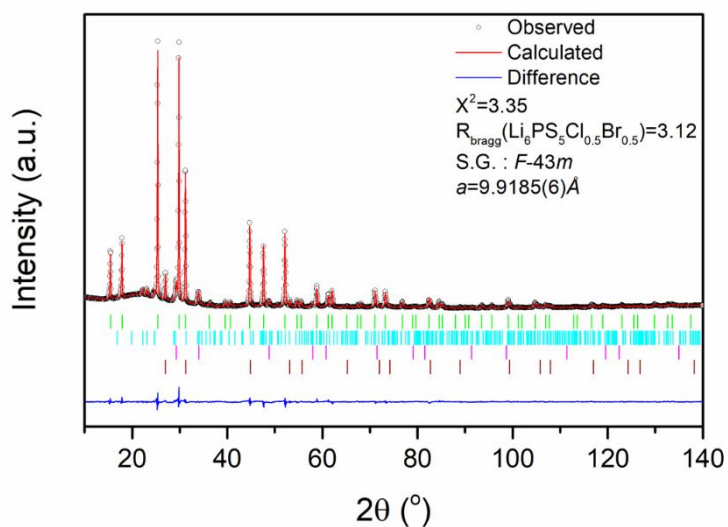

**Figure S4:** Rietveld refinement of XRD patterns of  $\text{Li}_6\text{PS}_5\text{Cl}_{0.5}\text{Br}_{0.5}$ . Black circles – experimental data; red lines – fitted data; blue lines – difference curve between observed and calculated data; ticks – the Bragg peak positions of  $\text{Li}_6\text{PS}_5\text{Cl}_{0.5}\text{Br}_{0.5}$  (green),  $\text{Li}_3\text{PO}_4$  (cyan),  $\text{LiCl}_{0.5}\text{Br}_{0.5}$  (magenta) and  $\text{Li}_2\text{S}$  (burgundy).

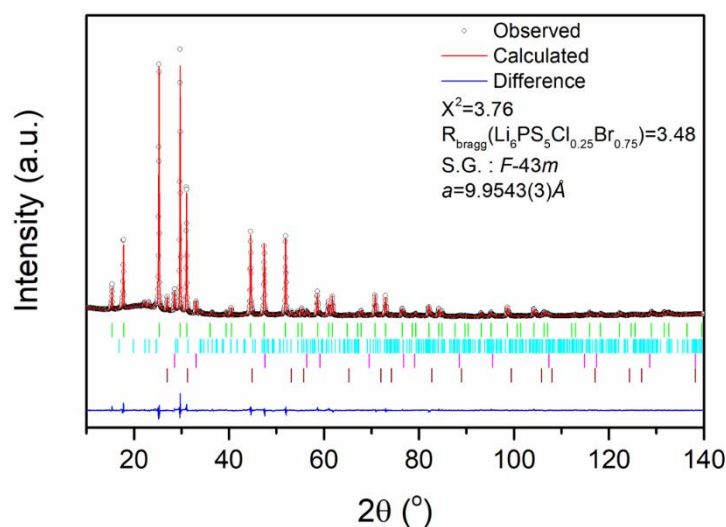

**Figure S5:** Rietveld refinement of XRD patterns of  $\text{Li}_6\text{PS}_5\text{Cl}_{0.25}\text{Br}_{0.75}$ . Black circles – experimental data; red lines – fitted data; blue lines – difference curve between observed and calculated data; ticks – the Bragg peak positions of  $\text{Li}_6\text{PS}_5$  (green),  $\text{Li}_3\text{PO}_4$  (cyan),  $\text{LiCl}_{0.25}\text{Br}_{0.75}$  (magenta) and  $\text{Li}_2\text{S}$  (burgundy).

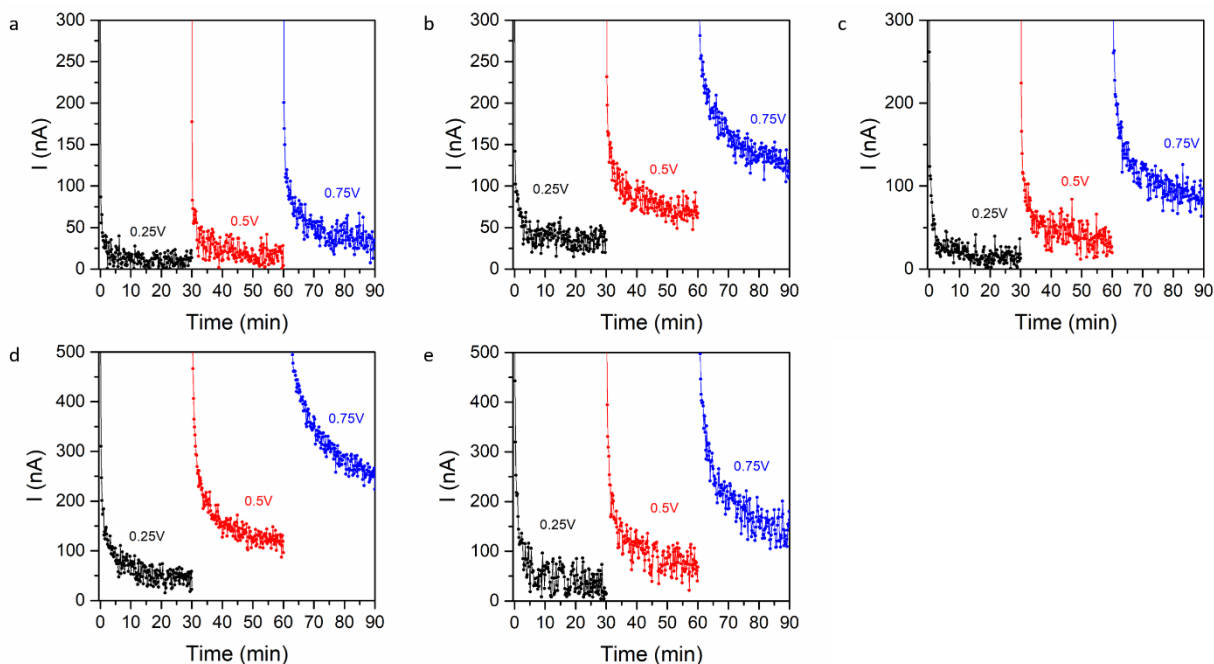

**Figure S6:** DC polarization curves of (a)  $\text{Li}_6\text{PS}_5\text{Cl}_{0.75}\text{Br}_{0.25}$ , (b)  $\text{Li}_6\text{PS}_5\text{Cl}_{0.5}\text{Br}_{0.5}$ , (c)  $\text{Li}_6\text{PS}_5\text{Cl}_{0.25}\text{Br}_{0.25}$ , (d)  $\text{Li}_{5.75}\text{PS}_{4.75}\text{Cl}_{1.25}$  and (e)  $\text{Li}_{5.5}\text{PS}_{4.5}\text{Cl}_{1.5}$  solid electrolytes with applied voltages of 0.25 V (black), 0.5 V (red), 0.75 V (blue) (cold-pressed at two tons, measured at 300K).

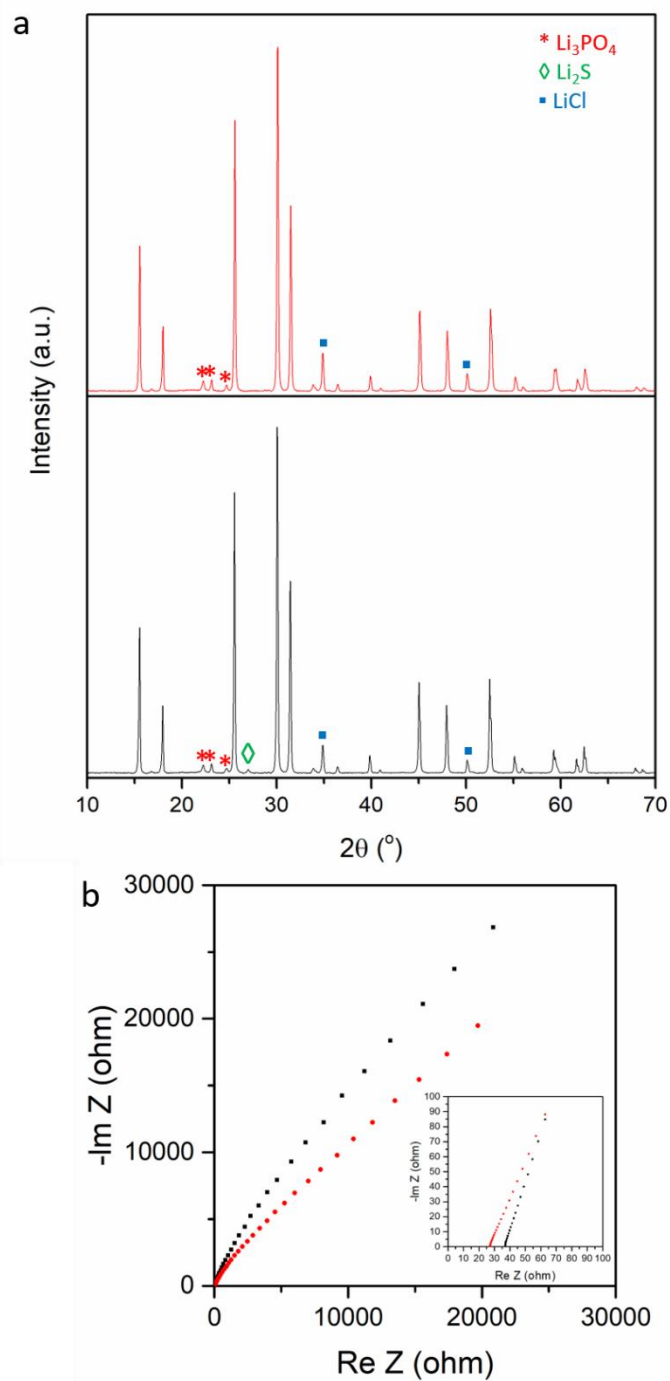

**Figure S7:** (a) XRD patterns of  $\text{Li}_{5.75}\text{PS}_{4.75}\text{Cl}_{1.25}$  (black) and  $\text{Li}_{5.5}\text{PS}_{4.5}\text{Cl}_{1.5}$  (red) from solution synthesis (all reflections correspond to the respective argyrodite phase except for the impurities as marked); (b) Nyquist plots for  $\text{Li}_{5.75}\text{PS}_{4.75}\text{Cl}_{1.25}$  (black squares) and  $\text{Li}_{5.5}\text{PS}_{4.5}\text{Cl}_{1.5}$  (red dots) (cold-pressed at 2 tons, measured at 300K, in the frequency range from 1 MHz-10 mHz).



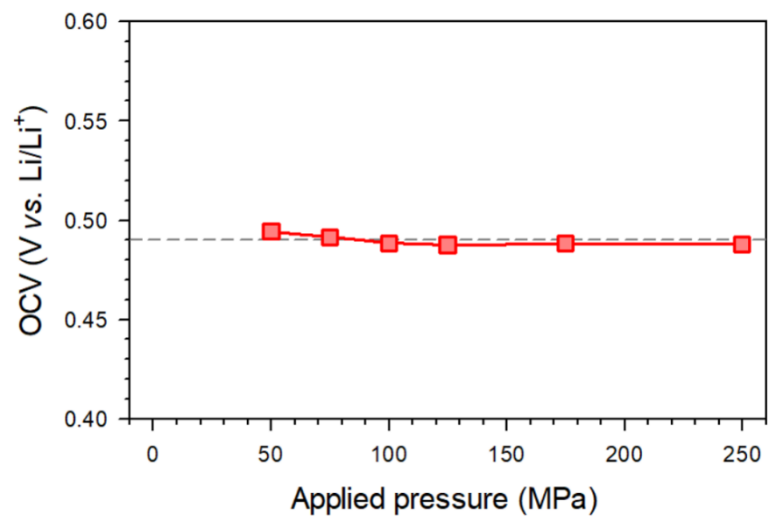

**Figure S8:** The open circuit voltage of the  $\text{Li}_{11}\text{Sn}_6/\text{Li}$  cell under applied cell pressure.

## List of Supporting Tables

**Table S1.** Refined parameters for Li<sub>6</sub>PS<sub>5</sub>Cl (space group = *F*-43*m*, a = 9.8598(3) Å, R<sub>Bragg</sub> = 4.83,  $\chi^2=4.50$ ).

| Atom | Wyckoff Site | <i>x</i>  | <i>y</i>   | <i>z</i>  | Occ.  | <i>B</i> <sub>iso</sub> (Å <sup>2</sup> ) |
|------|--------------|-----------|------------|-----------|-------|-------------------------------------------|
| Li1  | 48 <i>h</i>  | 0.3205    | 0.0182     | 0.6798    | 0.5   | 2                                         |
| Cl1  | 4 <i>a</i>   | 0         | 0          | 0         | 0.385 | 2.5(2)                                    |
| Cl2  | 4 <i>d</i>   | 0.75      | 0.75       | 0.75      | 0.615 | 2.5(2)                                    |
| P1   | 4 <i>b</i>   | 0         | 0          | 0.5       | 1     | 1.7(1)                                    |
| S1   | 16 <i>e</i>  | 0.1195(2) | -0.1195(2) | 0.6195(2) | 1     | 2.99(5)                                   |
| S2   | 4 <i>a</i>   | 0         | 0          | 0         | 0.615 | 2.5(2)                                    |
| S3   | 4 <i>d</i>   | 0.75      | 0.75       | 0.75      | 0.385 | 2.5(2)                                    |

**Table S2.** Refined parameters for Li<sub>6</sub>PS<sub>5</sub>Br (space group = *F*-43*m*, a = 9.9855(4) Å, R<sub>Bragg</sub> = 3.26,  $\chi^2 = 4.71$ ).

| Atom | Wyckoff Site | <i>x</i>  | <i>y</i>   | <i>z</i>  | Occ.     | <i>B</i> <sub>iso</sub> (Å <sup>2</sup> ) |
|------|--------------|-----------|------------|-----------|----------|-------------------------------------------|
| Li1  | 48 <i>h</i>  | 0.3071    | 0.0251     | 0.6929    | 0.441    | 2                                         |
| Li2  | 24 <i>g</i>  | 0.25      | 0.017      | 0.75      | 0.119    | 2                                         |
| Br1  | 4 <i>a</i>   | 0         | 0          | 0         | 0.785(2) | 2.9(1)                                    |
| Br2  | 4 <i>d</i>   | 0.75      | 0.75       | 0.75      | 0.215(2) | 1.6(1)                                    |
| P1   | 4 <i>b</i>   | 0         | 0          | 0.5       | 1        | 1.3(1)                                    |
| S1   | 16 <i>e</i>  | 0.1184(2) | -0.1184(2) | 0.6184(2) | 1        | 1.97(7)                                   |
| S2   | 4 <i>a</i>   | 0         | 0          | 0         | 0.215(2) | 2.9(1)                                    |
| S3   | 4 <i>d</i>   | 0.75      | 0.75       | 0.75      | 0.785(2) | 1.6(1)                                    |

**Table S3.** Refined parameters for  $\text{Li}_6\text{PS}_5\text{Cl}_{0.75}\text{Br}_{0.25}$  (space group =  $F-43m$ ,  $a = 9.8880(4)$  Å,  $R_{\text{Bragg}} = 3.42$ ,  $X^2=2.90$ ).

| Atom | Wyckoff Site | $x$       | $y$        | $z$       | Occ.     | $B_{\text{iso}}$ (Å <sup>2</sup> ) |
|------|--------------|-----------|------------|-----------|----------|------------------------------------|
| Li1  | 48 <i>h</i>  | 0.3166    | 0.0178     | 0.6834    | 0.5      | 2                                  |
| Br1  | 4 <i>a</i>   | 0         | 0          | 0         | 0.22(2)  | 2.9(2)                             |
| Cl1  | 4 <i>a</i>   | 0         | 0          | 0         | 0.26(2)  | 2.9(2)                             |
| Br2  | 4 <i>d</i>   | 0.75      | 0.75       | 0.75      | 0.04(2)  | 1.3(2)                             |
| Cl2  | 4 <i>d</i>   | 0.75      | 0.75       | 0.75      | 0.49 (2) | 1.3(2)                             |
| P1   | 4 <i>b</i>   | 0         | 0          | 0.5       | 1        | 1.54(8)                            |
| S1   | 16 <i>e</i>  | 0.1200(2) | -0.1200(2) | 0.6200(2) | 1        | 2.99(5)                            |
| S2   | 4 <i>a</i>   | 0         | 0          | 0         | 0.53(2)  | 2.9(2)                             |
| S3   | 4 <i>d</i>   | 0.75      | 0.75       | 0.75      | 0.47(2)  | 1.3(2)                             |

**Table S4.** Refined parameters for  $\text{Li}_6\text{PS}_5\text{Cl}_{0.5}\text{Br}_{0.5}$  (space group =  $F-43m$ ,  $a = 9.9185(6)$  Å,  $R_{\text{Bragg}} = 3.12$ ,  $X^2=3.35$ ).

| Atom | Wyckoff Site | $x$       | $y$        | $z$       | Occ.    | $B_{\text{iso}}$ (Å <sup>2</sup> ) |
|------|--------------|-----------|------------|-----------|---------|------------------------------------|
| Li1  | 48 <i>h</i>  | 0.3132    | 0.0212     | 0.6868    | 0.5     | 2                                  |
| Br1  | 4 <i>a</i>   | 0         | 0          | 0         | 0.39(2) | 3.0(2)                             |
| Cl1  | 4 <i>a</i>   | 0         | 0          | 0         | 0.20(2) | 3.0(2)                             |
| Br2  | 4 <i>d</i>   | 0.75      | 0.75       | 0.75      | 0.11(2) | 1.4(2)                             |
| Cl2  | 4 <i>d</i>   | 0.75      | 0.75       | 0.75      | 0.30(2) | 1.4(2)                             |
| P1   | 4 <i>b</i>   | 0         | 0          | 0.5       | 1       | 1.6(1)                             |
| S1   | 16 <i>e</i>  | 0.1194(2) | -0.1194(2) | 0.6194(2) | 1       | 2.86(6)                            |
| S2   | 4 <i>a</i>   | 0         | 0          | 0         | 0.41(2) | 3.0(2)                             |
| S3   | 4 <i>d</i>   | 0.75      | 0.75       | 0.75      | 0.59(2) | 1.4(2)                             |

**Table S5.** Refined parameters for  $\text{Li}_6\text{PS}_5\text{Cl}_{0.25}\text{Br}_{0.75}$  (space group =  $F-43m$ ,  $a = 9.9543(3)$  Å,  $R_{\text{Bragg}} = 3.48$ ,  $\chi^2=3.76$ ).

| Atom | Wyckoff Site | $x$       | $y$        | $z$       | Occ.    | $B_{\text{iso}}$ (Å <sup>2</sup> ) |
|------|--------------|-----------|------------|-----------|---------|------------------------------------|
| Li1  | 48h          | 0.3138    | 0.0235     | 0.6862    | 0.5     | 2                                  |
| Br1  | 4a           | 0         | 0          | 0         | 0.61(2) | 2.79(9)                            |
| Cl1  | 4a           | 0         | 0          | 0         | 0.10(2) | 2.79(9)                            |
| Br2  | 4d           | 0.75      | 0.75       | 0.75      | 0.14(2) | 1.4(1)                             |
| Cl2  | 4d           | 0.75      | 0.75       | 0.75      | 0.15(2) | 1.4(1)                             |
| P1   | 4b           | 0         | 0          | 0.5       | 1       | 1.02(7)                            |
| S1   | 16e          | 0.1191(1) | -0.1191(1) | 0.6191(1) | 1       | 2.05(4)                            |
| S2   | 4a           | 0         | 0          | 0         | 0.29(2) | 2.79(9)                            |
| S3   | 4d           | 0.75      | 0.75       | 0.75      | 0.71(2) | 1.4(1)                             |

## REFERENCES

- 
- (1) Liu, Z.; Fu, W.; Payzant, E. A.; Yu, X.; Wu, Z.; Dudney, N. J.; Kiggans, J.; Hong, K.; Rondinone, A. J.; Liang, C. Anomalous High Ionic Conductivity of Nanoporous  $\beta\text{-Li}_3\text{PS}_4$ . *J. Am. Chem. Soc.* **2013**, *135*, 975-978.
- (2) Rietveld, H. M. A Profile Refinement Method for Nuclear and Magnetic Structures. *J. Appl. Cryst.* **1969**, *2*, 65-71.
- (3) Rodríguez-Carvajal, J. Recent Advances in Magnetic Structure Determination by Neutron Powder Diffraction. *Physica. B: Condensed Matter.* **1993**, *192*, 55-69.
- (4) Mayo, M.; Morris, A. J. Structure Prediction of Li-Sn and Li-Sb Intermetallics for Lithium-ion Batteries Anodes. *Chem. Mater.* **2017**, *29*, 5787-5795.
